# Supplementary material for: Plasma imaging for physical variations in laser-induced aerosol plasma with particle size increase
Source: Royal Society of Chemistry journal article supplement (doi:10.1039/d0ja00297f), 2020-01-01
Supplement: d0ja00297f1.pdf [file d0ja00297f1.pdf]

## Supplementary Material

### Plasma Imaging for Physical Variations in Laser-Induced Aerosol Plasma with Particle Size Increase

*Muhammad Sher Afgan, Sahar Sheta, Yuzhou Song, Weilun Gu, and Zhe Wang\**

\* State Key Laboratory of Power Systems, International Joint Laboratory on Low Carbon Clean Energy Innovation, Department of Energy & Power Engineering, Tsinghua-BP Clean Energy Research & Education Centre, Tsinghua University, Tsinghua University, Beijing 100084, China.

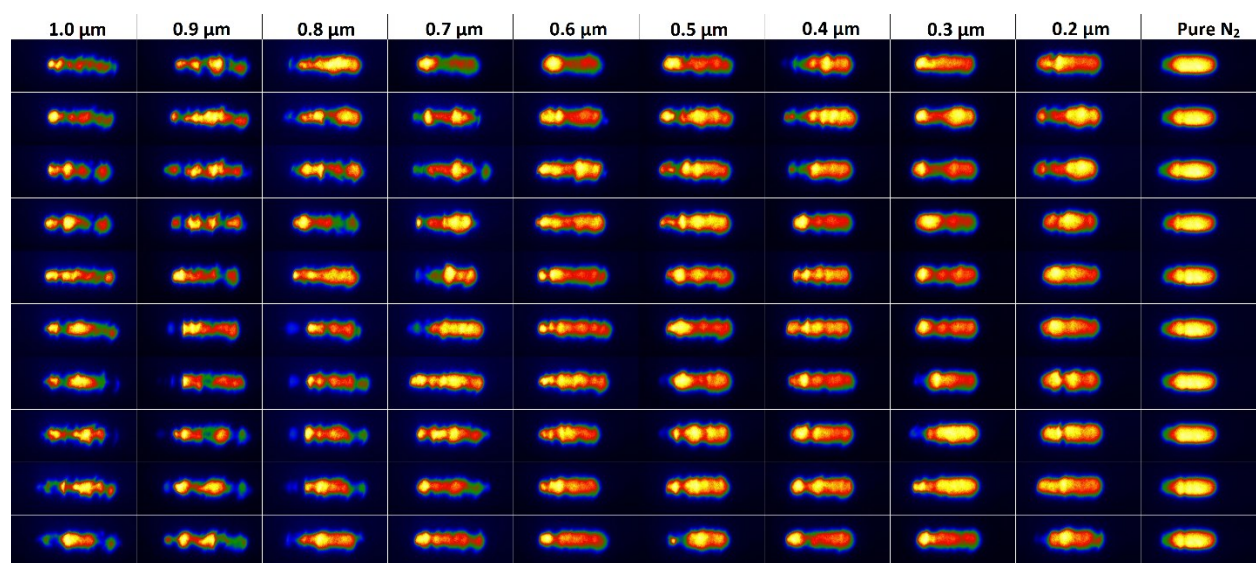

Fig. S-1 Images of aerosol plasma for pure N<sub>2</sub> and different aerosol sizes at delay 0.5 μs. Each column shows 10 repeated laser ablation events at identical conditions for same particle size.
